# Supplementary material for: A structure-activity relationship analysis of anthraquinones with antifouling activity against marine biofilm-forming bacteria
Source: Frontiers journal article supplement (doi:10.3389/fntpr.2022.990822), 2022-10-18
Supplement: Data_Sheet_1.docx [file Data_Sheet_1.docx]

Figure S1: Structural similarity of the compounds used in the initial screening (created using Data Warrior Software, Sander et al., 2015)


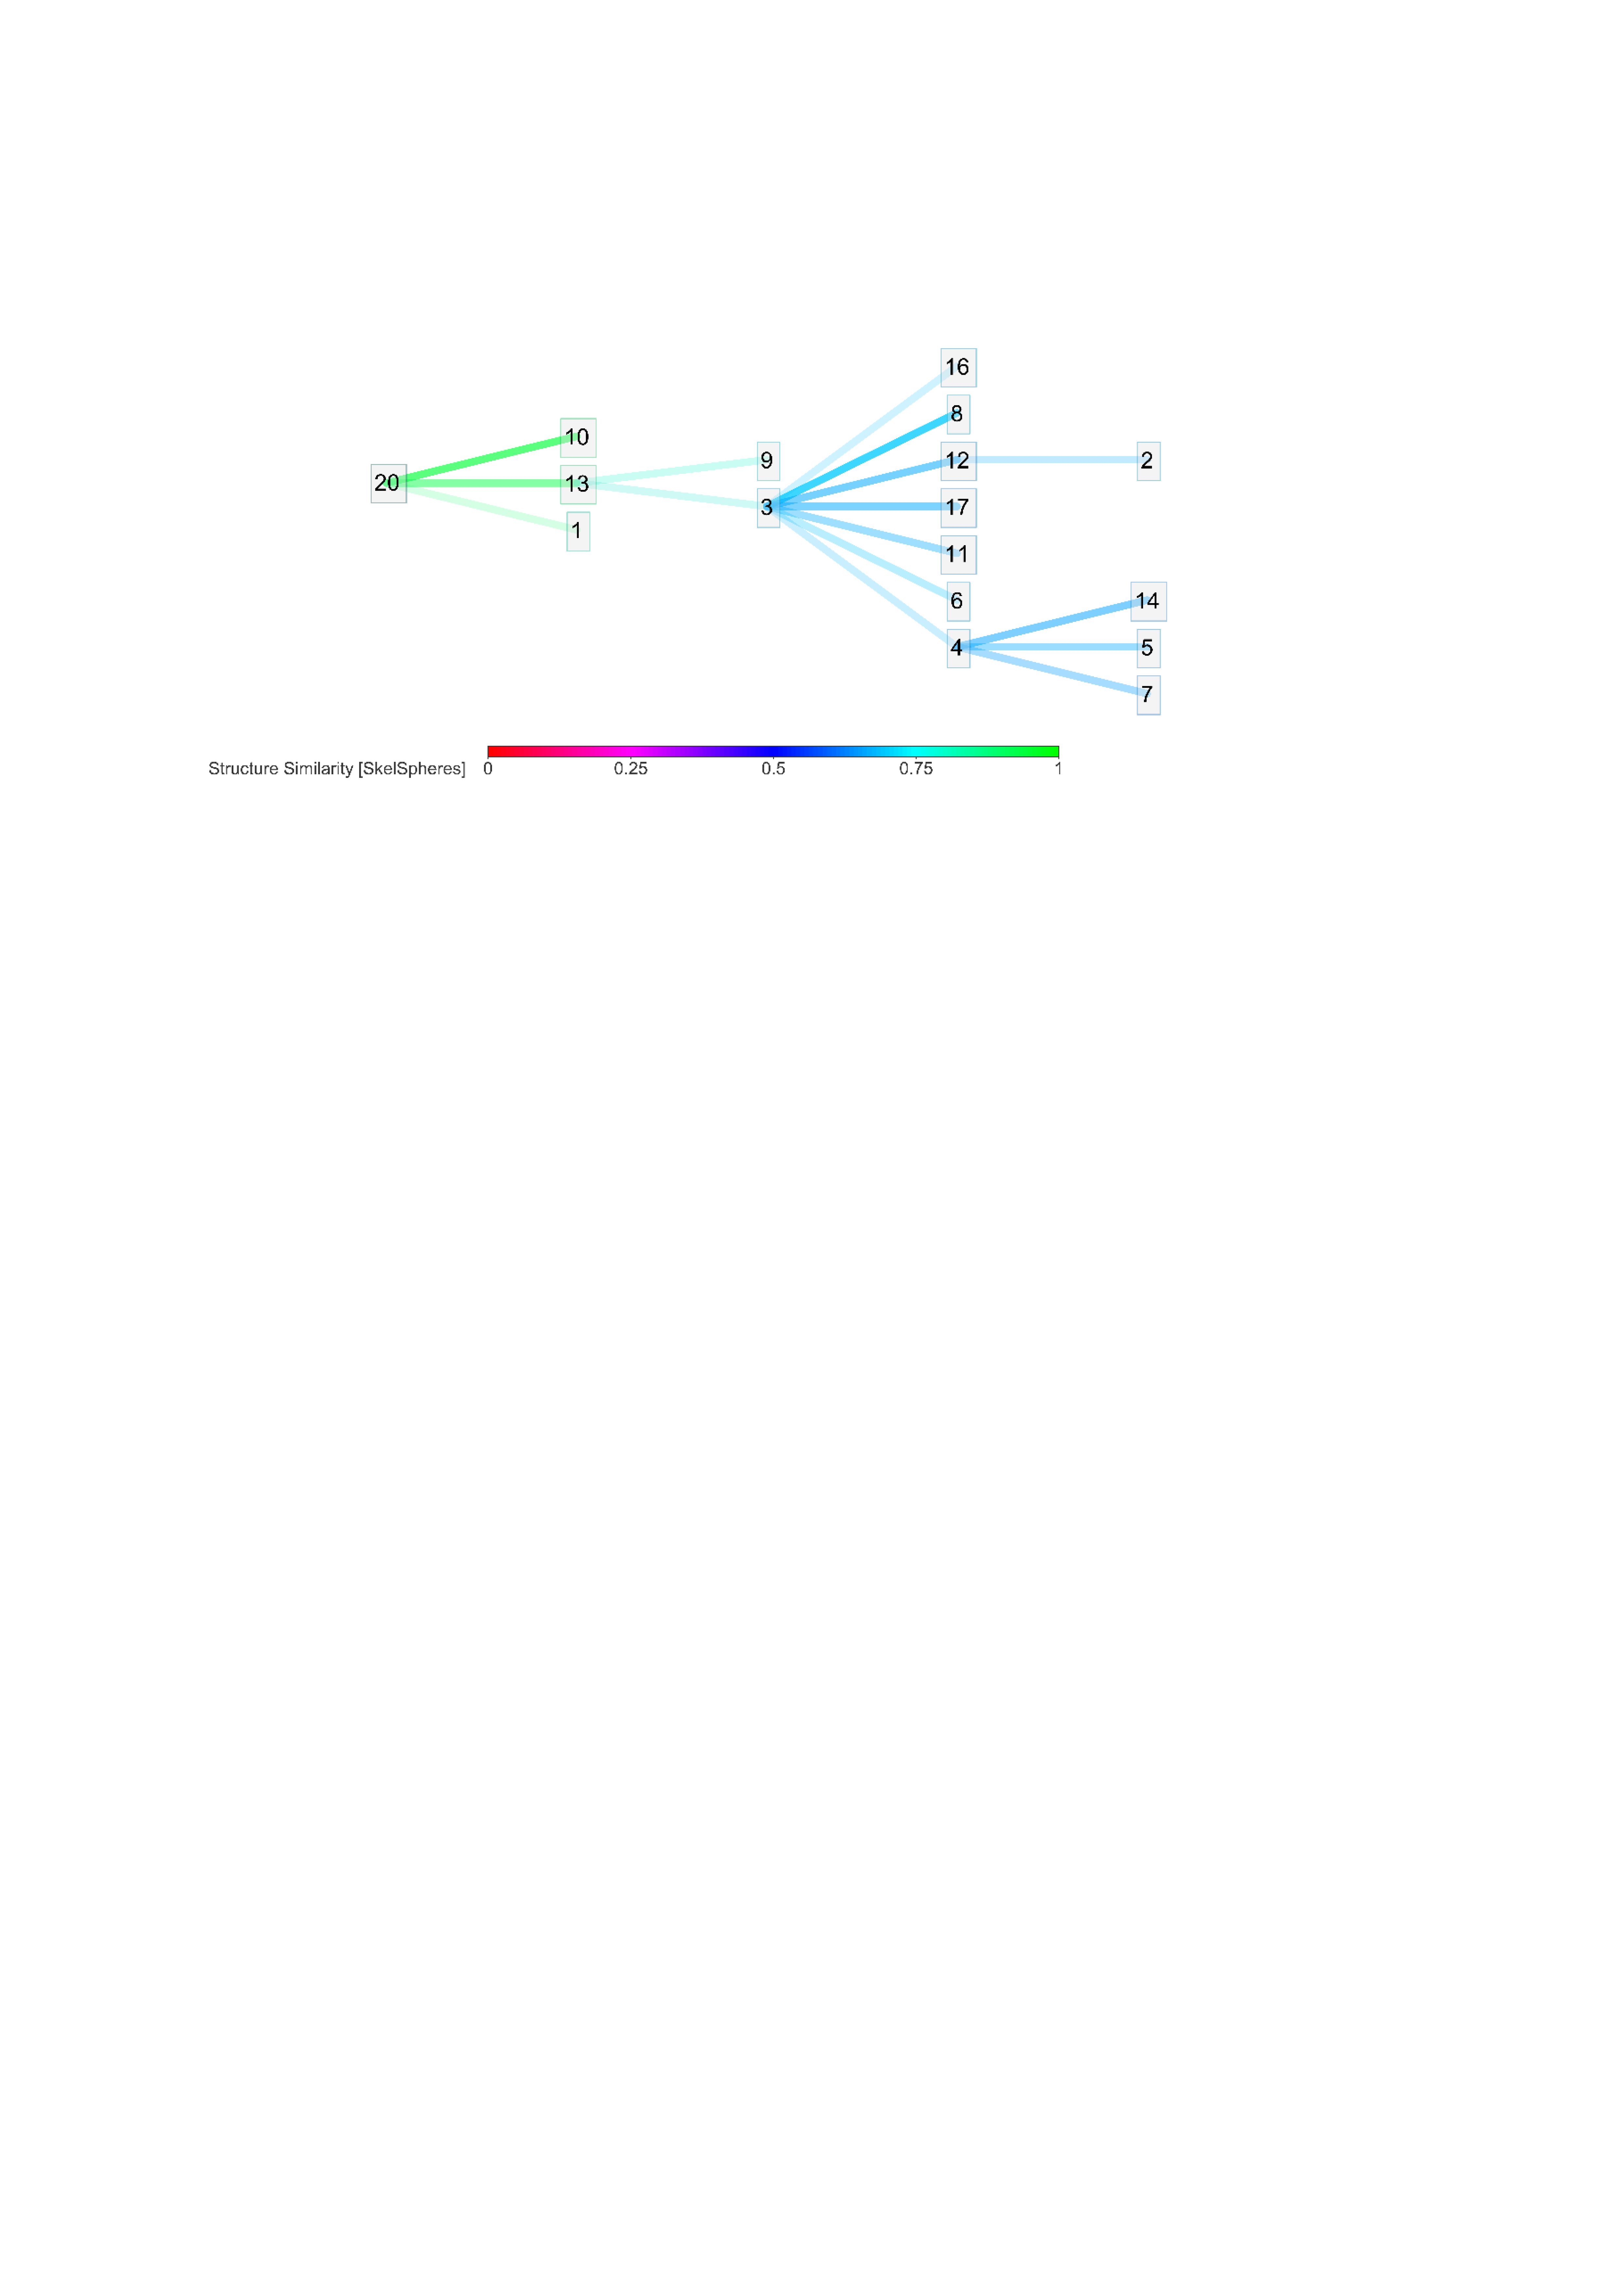


Figure S2: Structural similarity of the compounds used in the MIC study (created using Data Warrior Software, Sander et al., 2015)


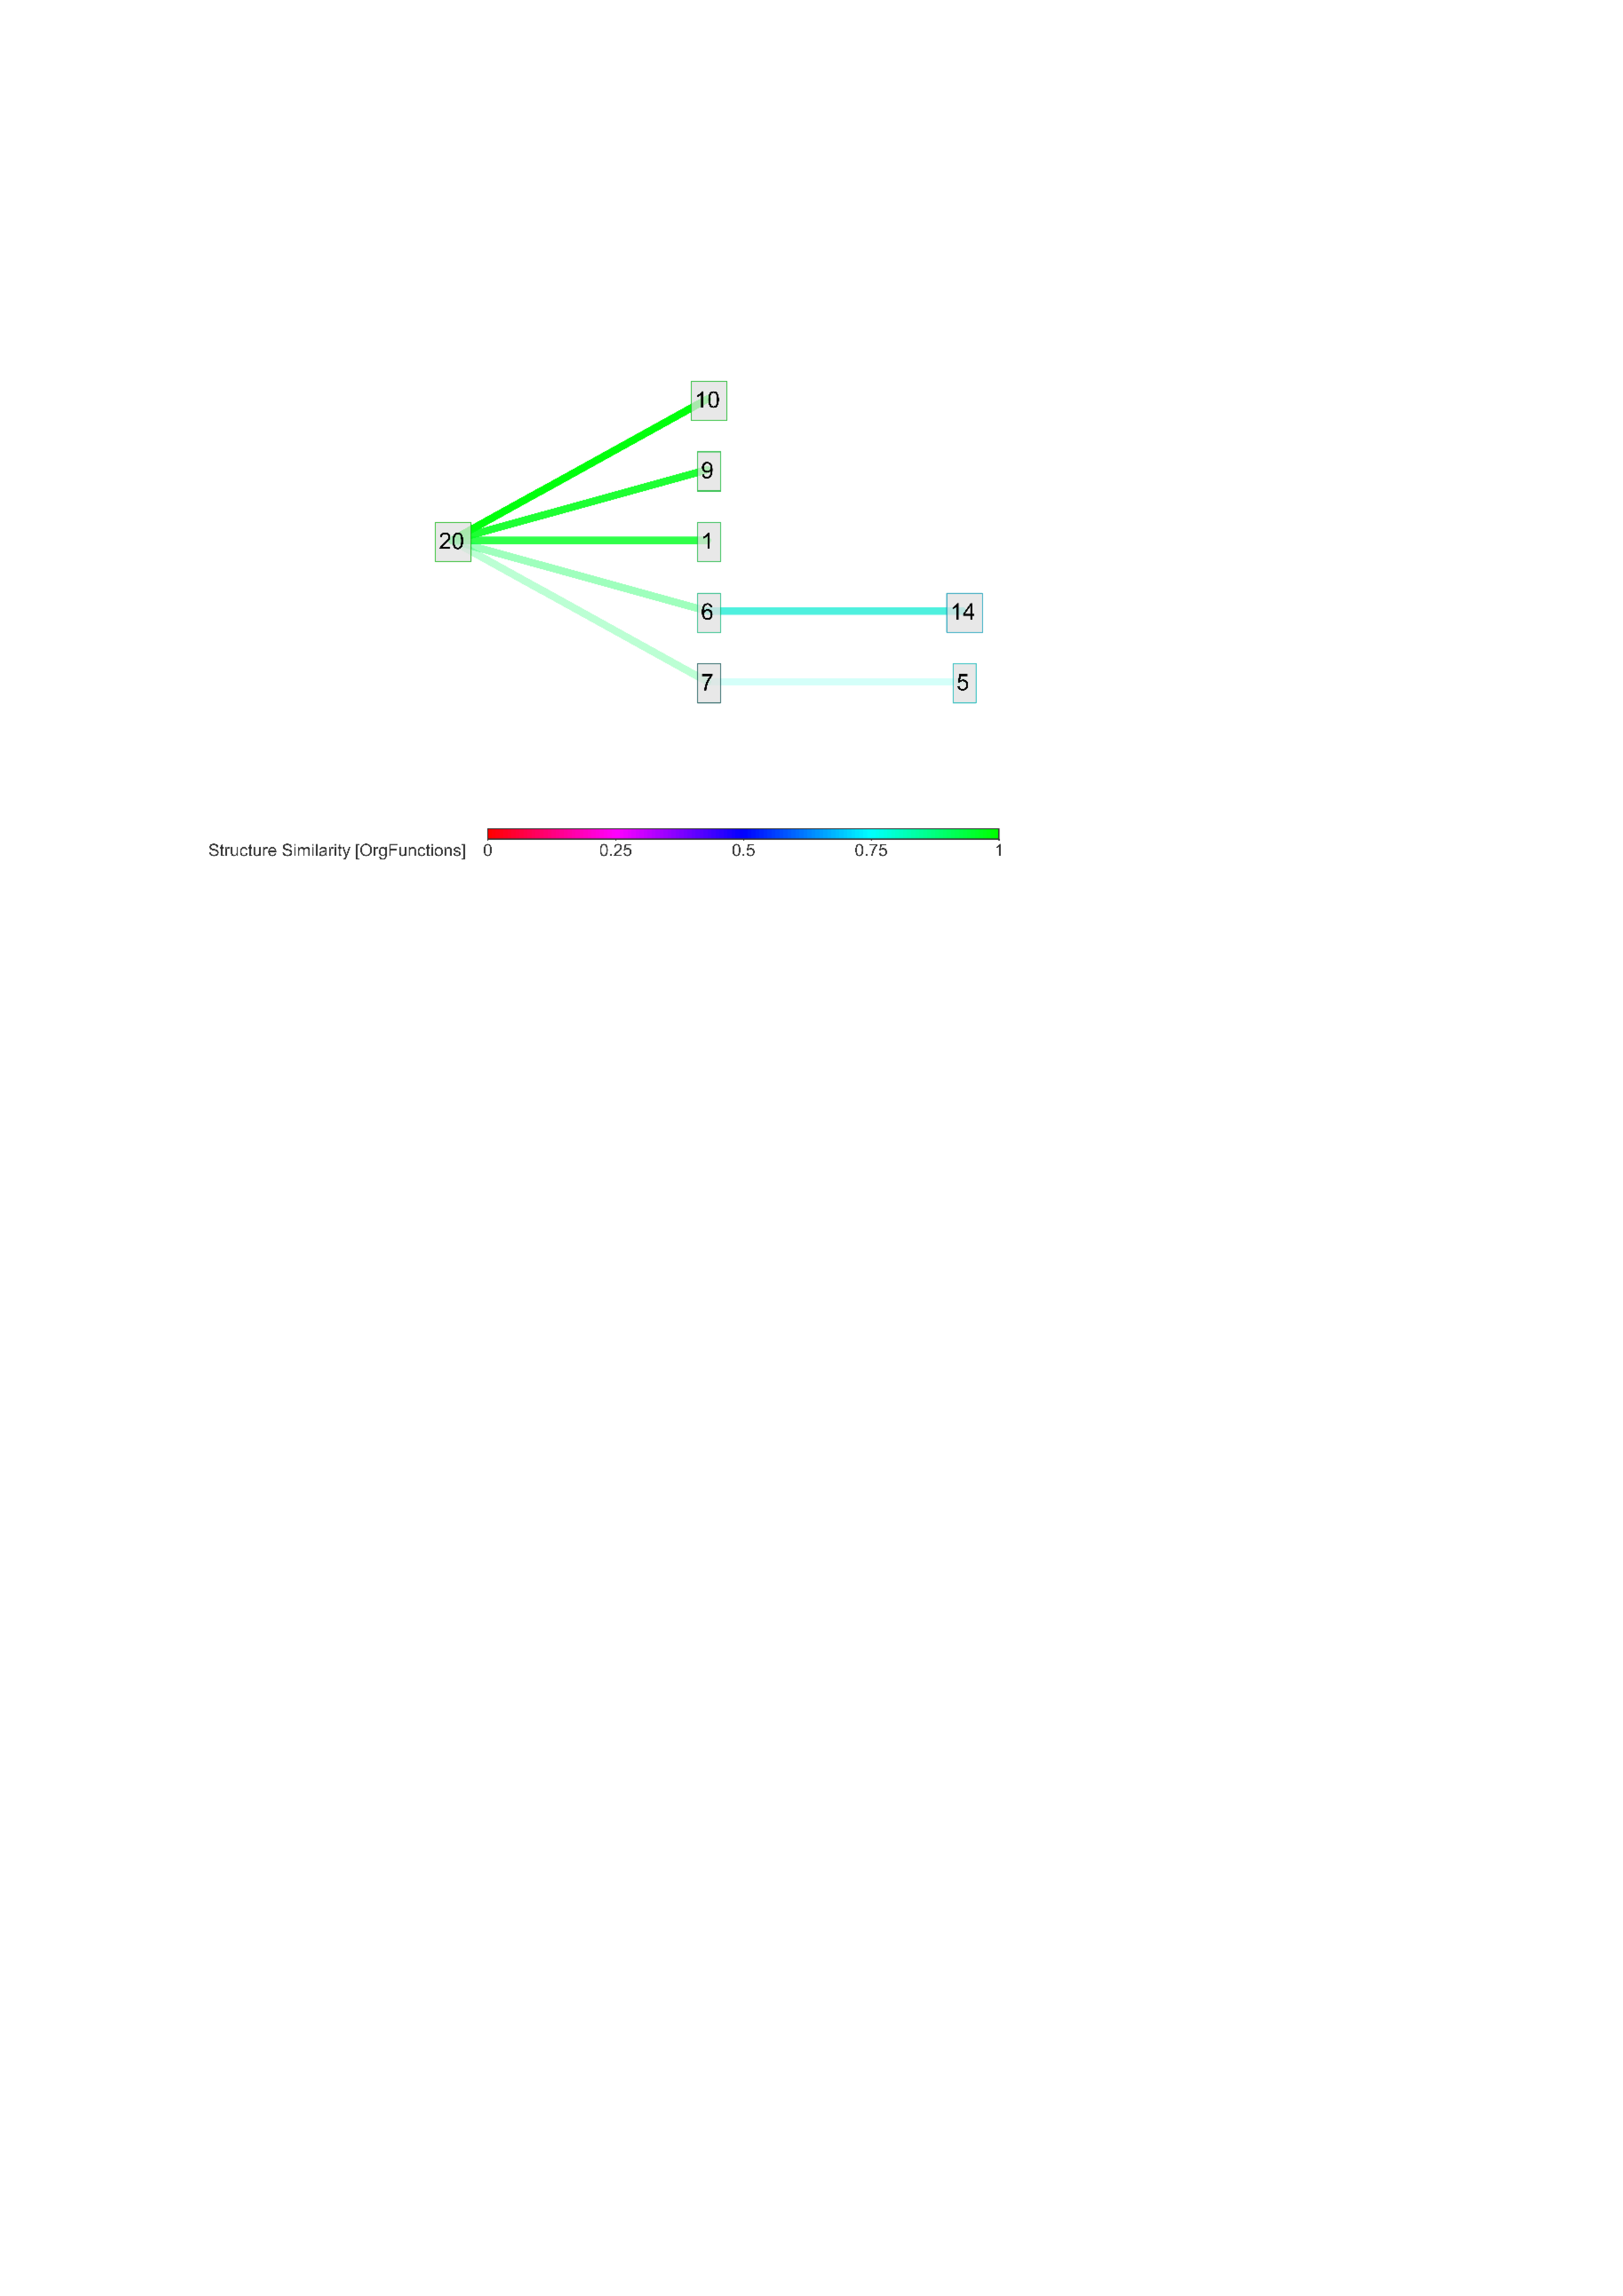


Figure S3: Microbial growth and biofilm adhesion inhibition 19 anthraquinone compounds (10 μg/mL) against *S. putrefaciens*


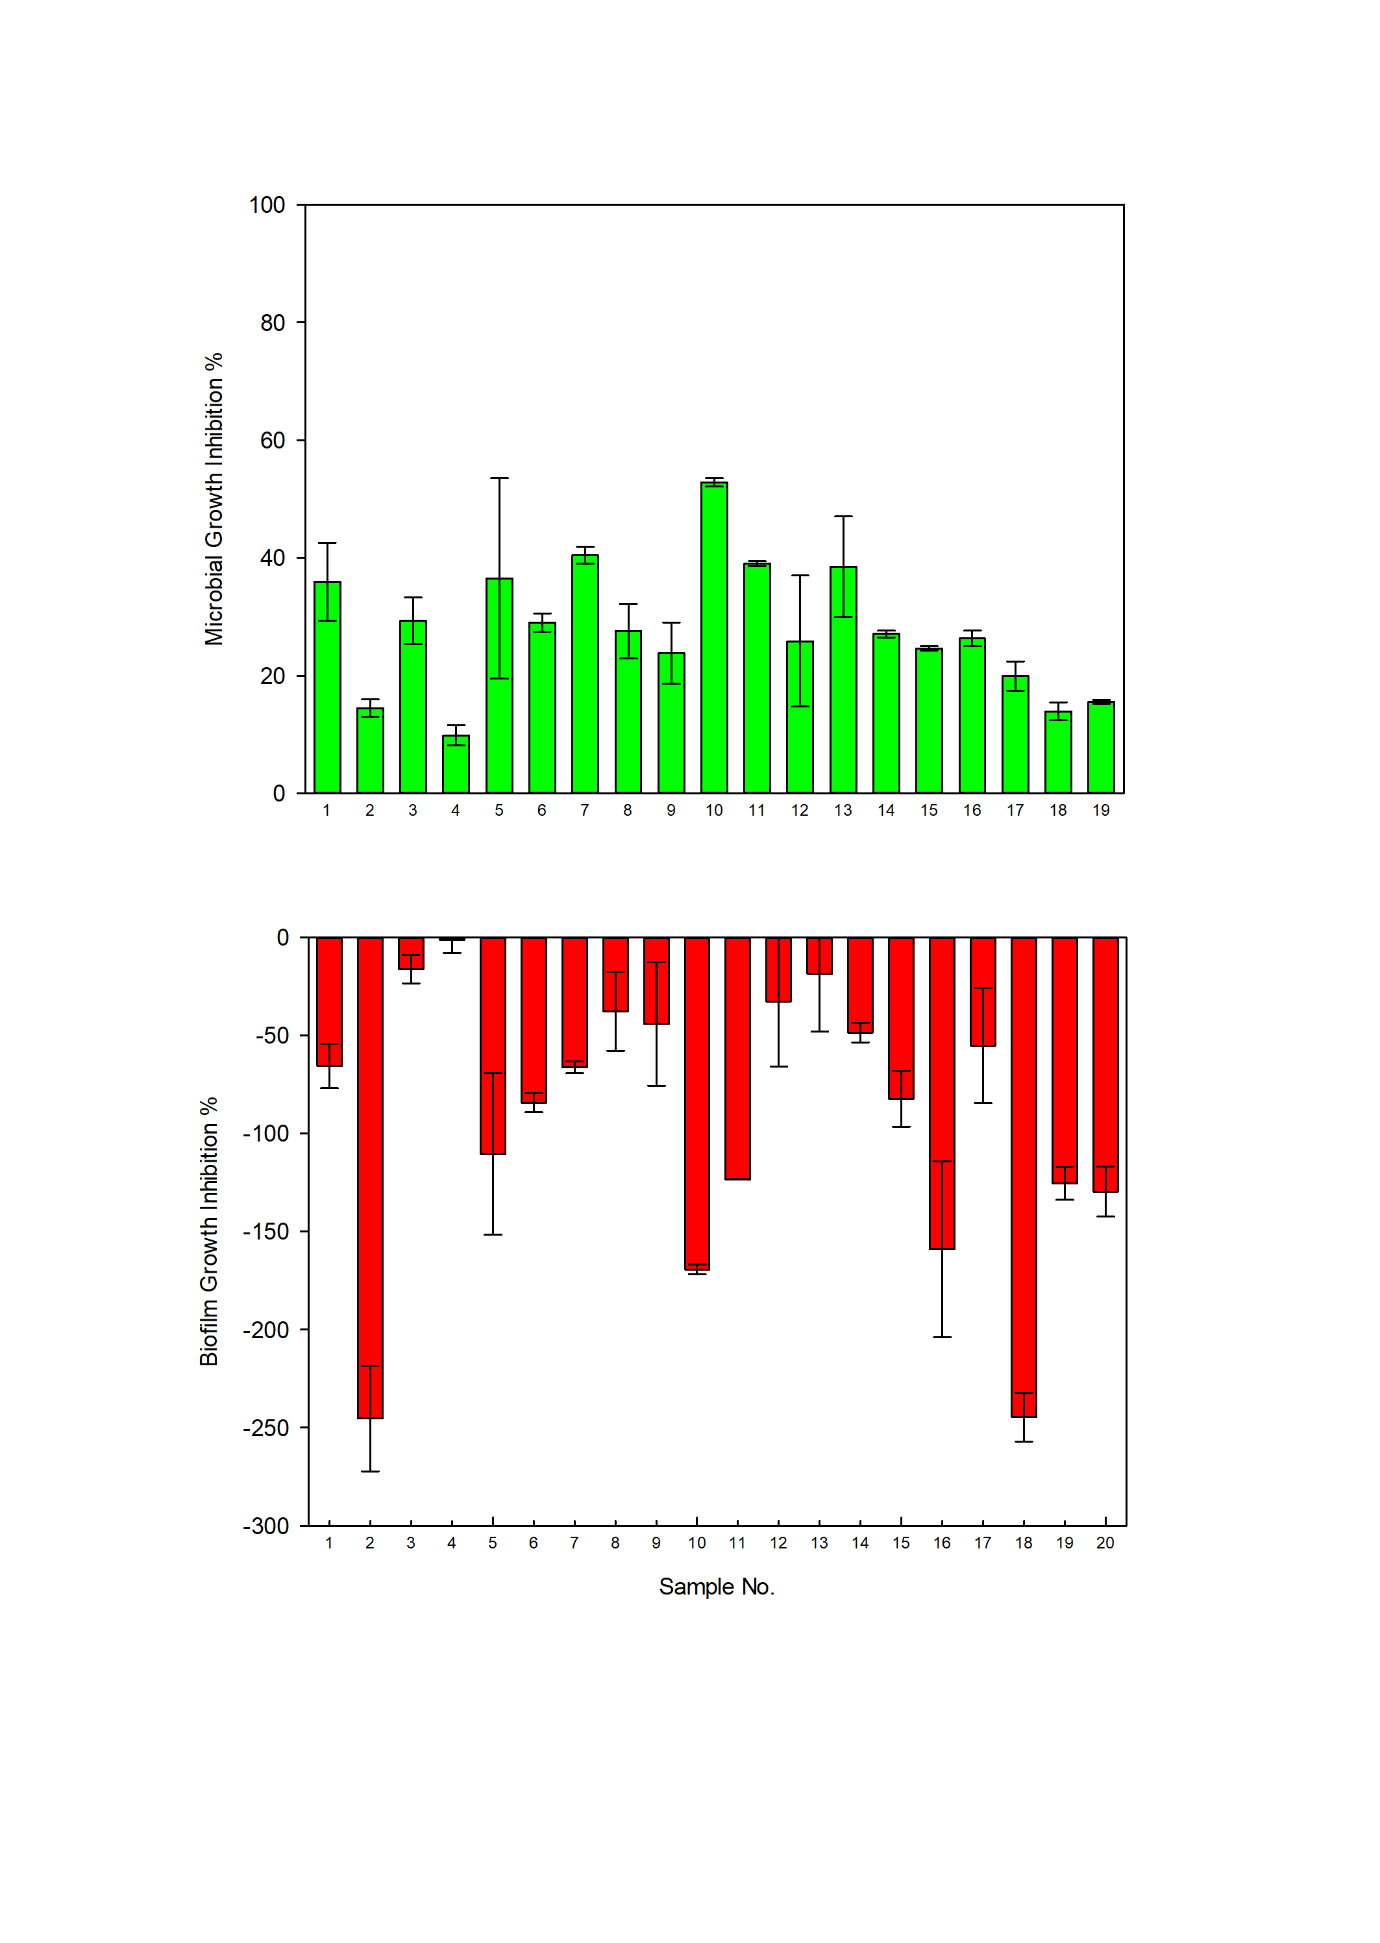


Figure S4: 1H NMR spectrum of compound **1**

Figure S5: 1H NMR spectrum of compound **2**

Figure S6: 1H NMR spectrum of compound **3**

Figure S7: 1H NMR spectrum of compound **4**

Figure S8: 1H NMR spectrum of compound **5**

Figure S9: 1H NMR spectrum of compound **6**

Figure S10: 1H NMR spectrum of compound **7**

Figure S11: 1H NMR spectrum of compound **8**

Figure S12: 1H NMR spectrum of compound **9**

Figure S13: 1H NMR spectrum of compound **10**

Figure S14: 1H NMR spectrum of compound **11**

Figure S15: 1H NMR spectrum of compound **12**

Figure S16: 1H NMR spectrum of compound **13**

Figure S17: 1H NMR spectrum of compound **14**

Figure S18: 1H NMR spectrum of compound **15**

Figure S19: 1H NMR spectrum of compound **16**

Figure S20: 1H NMR spectrum of compound **17**

Figure S21: 1H NMR spectrum of compound **18**
